# Supplementary figures and images for: Network Hubs Buffer Environmental Variation in Saccharomyces cerevisiae
Source: PLOS journal article supplement (doi:10.1371/journal.pbio.0060264), 2008-10-31

Figure S5

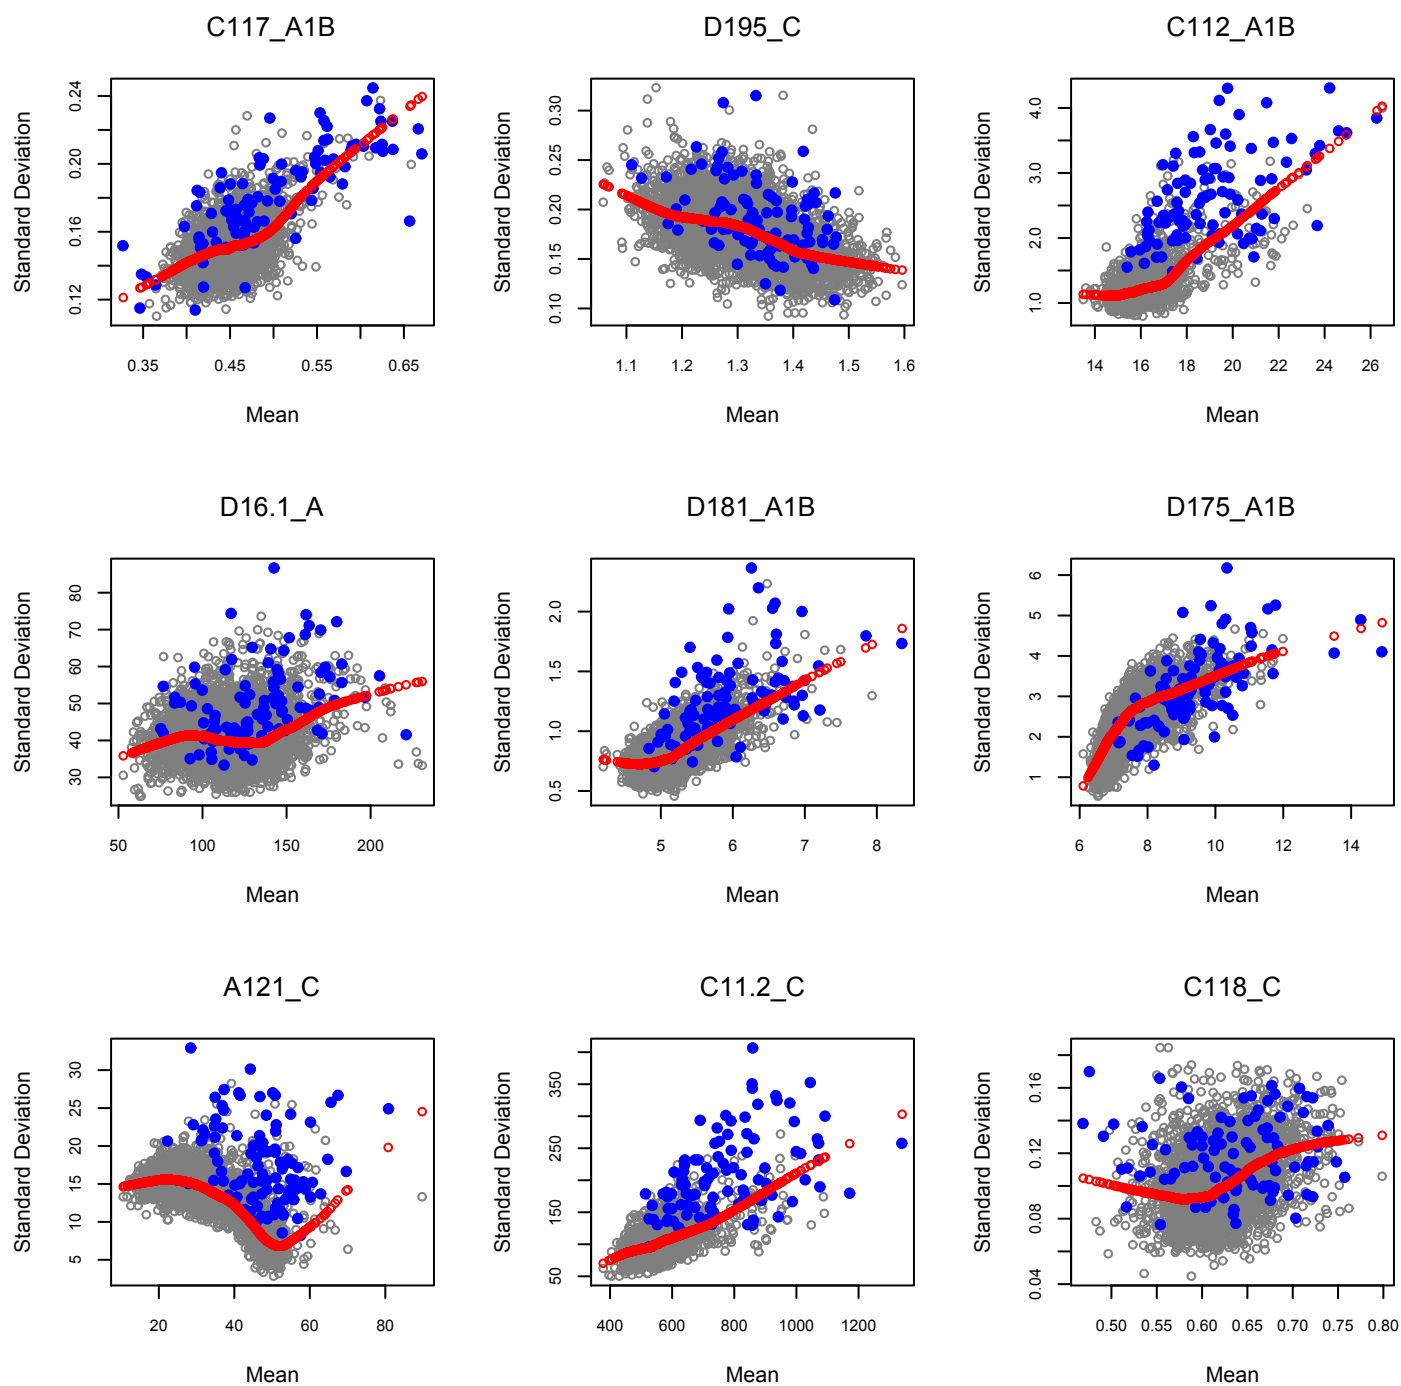

Supplement: S5 (10.1371/journal.pbio.0060264.s005) [file journal.pbio.0060264.s005]

Figure S12

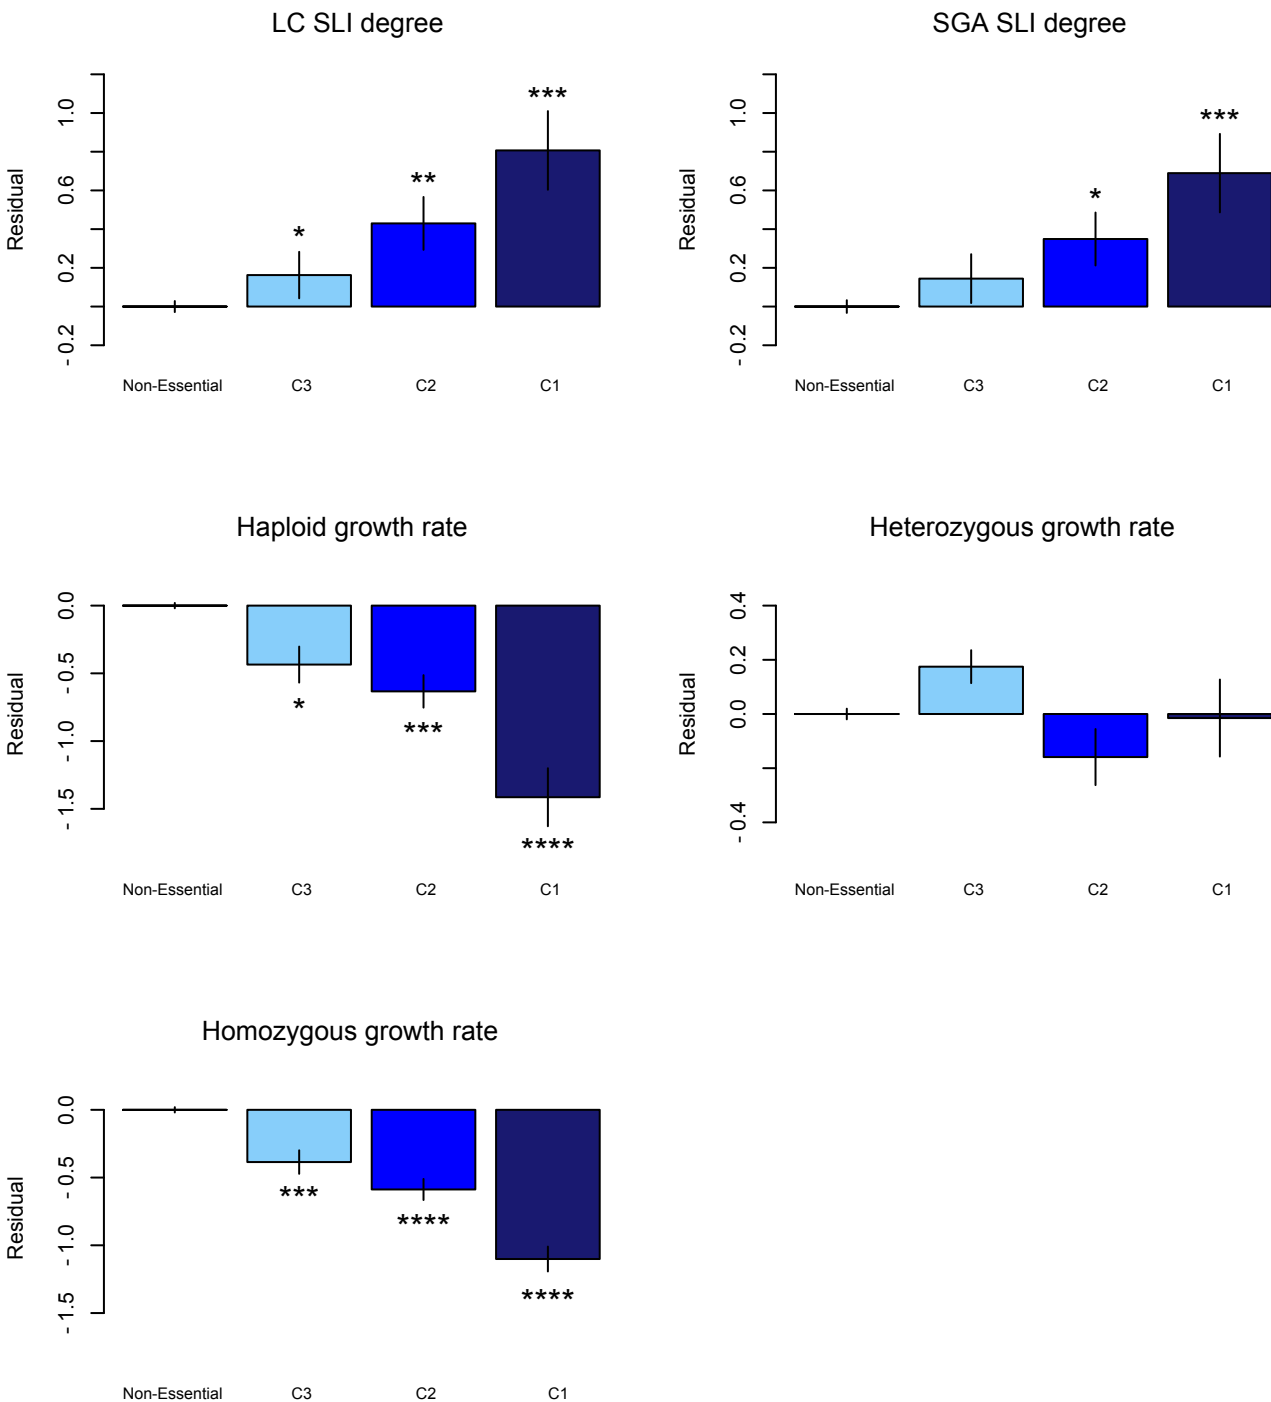

Supplement: S12 (10.1371/journal.pbio.0060264.s012) [file journal.pbio.0060264.s012]

Figure S13

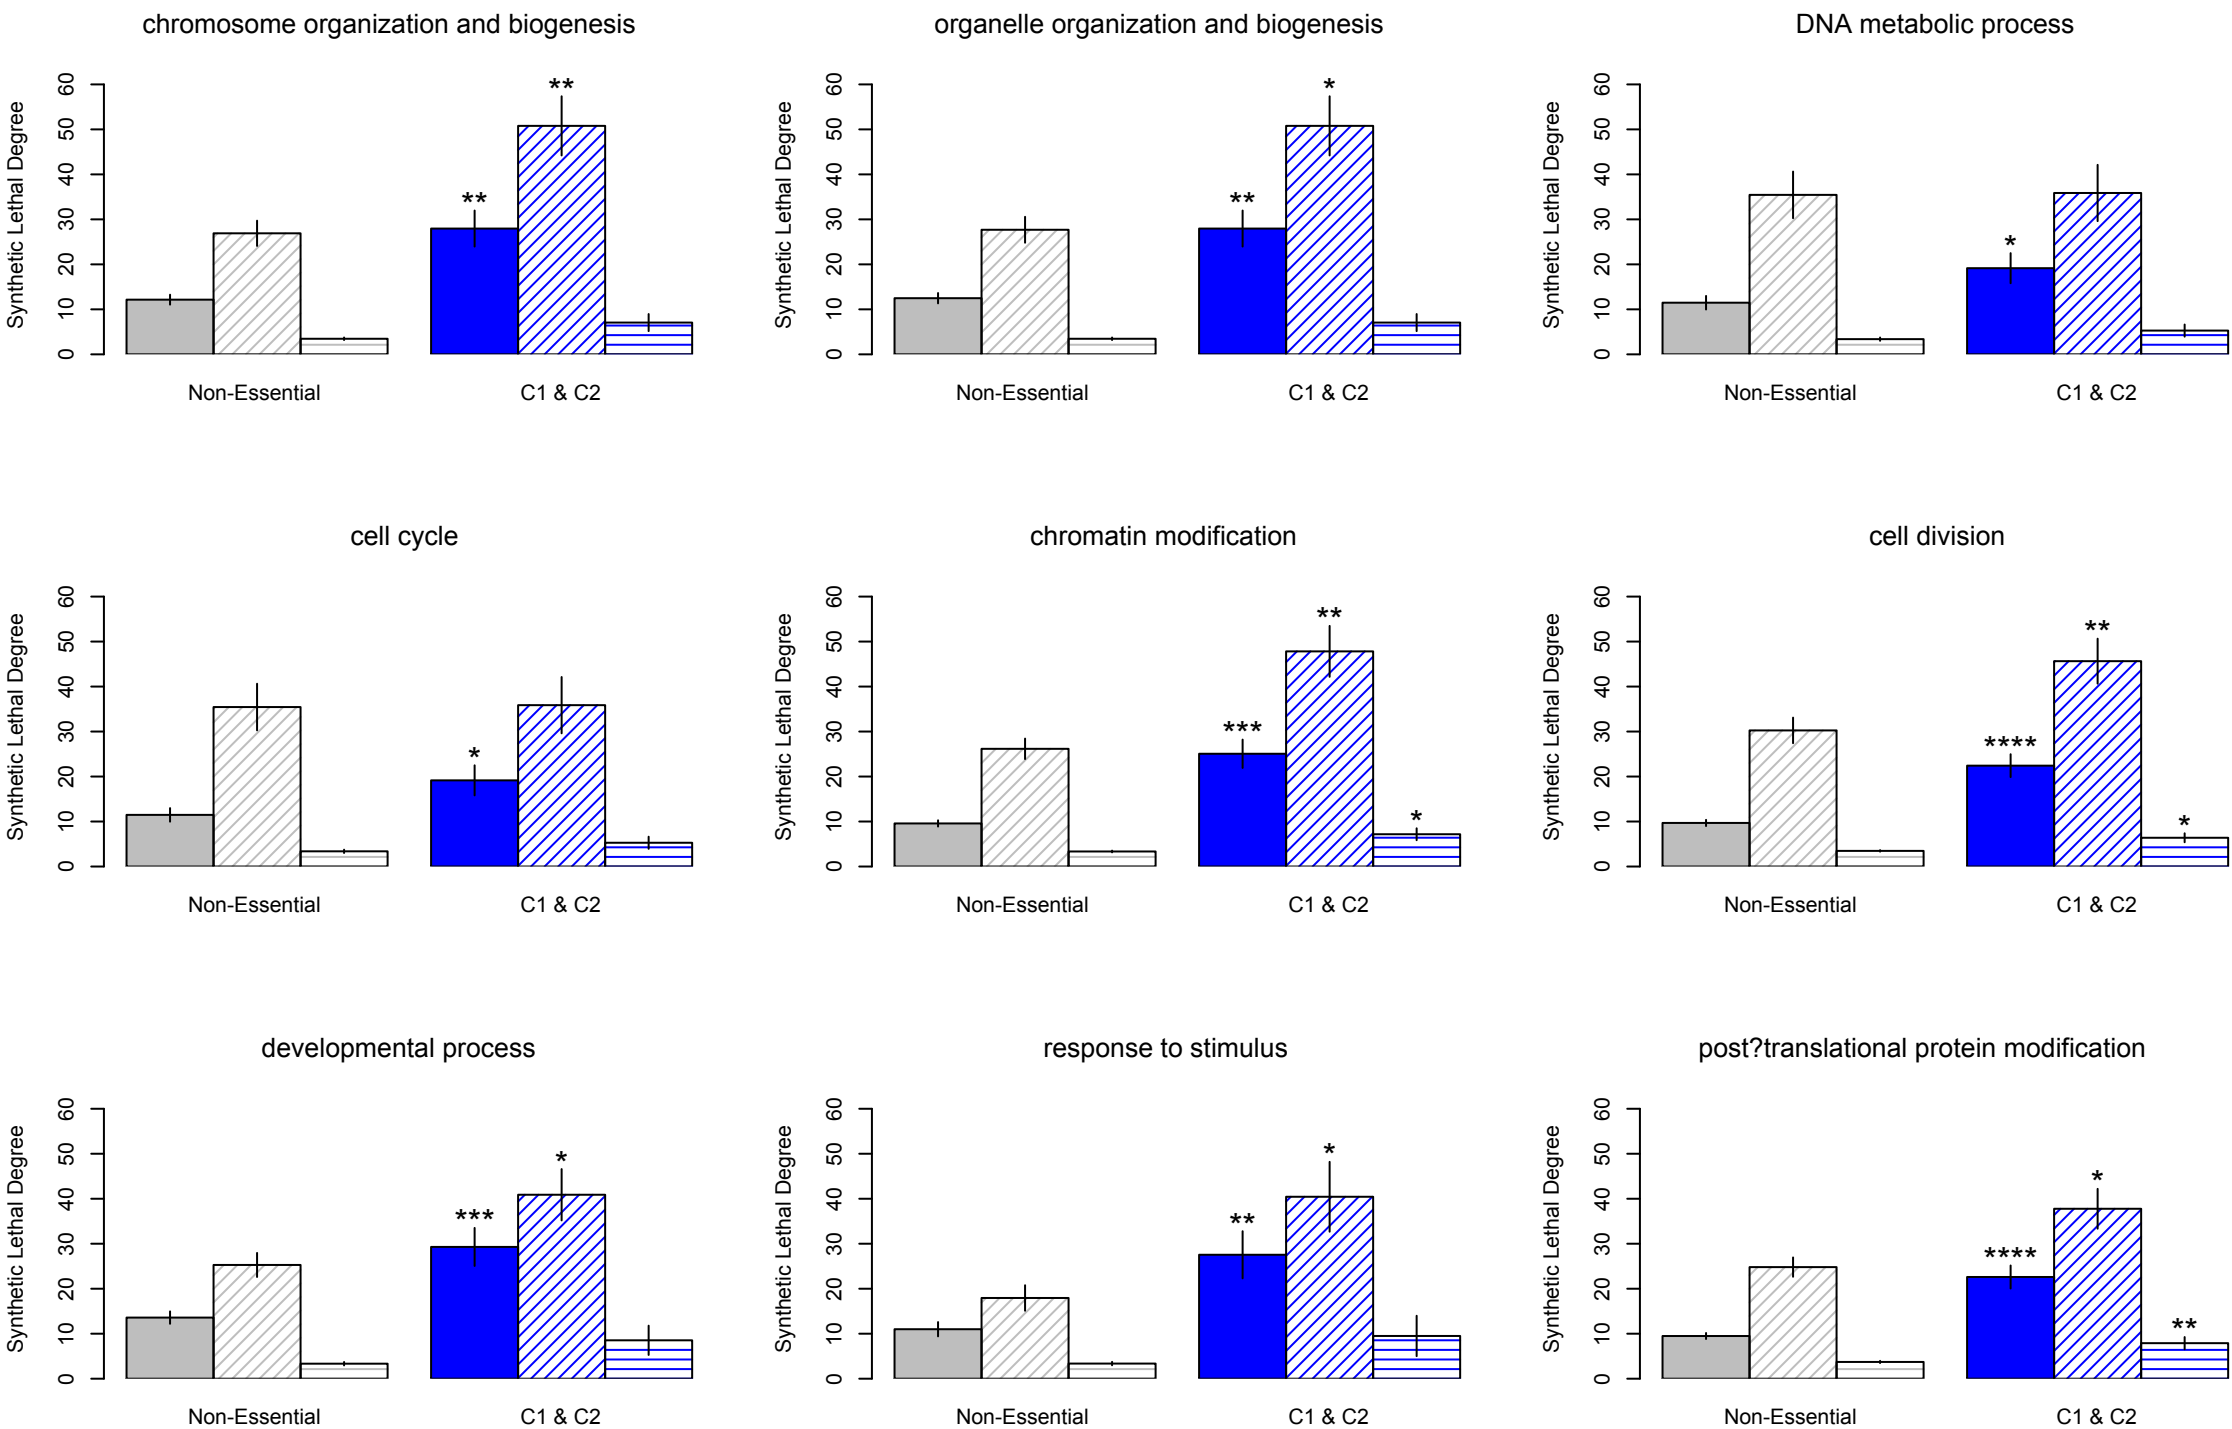

Supplement: S13 (10.1371/journal.pbio.0060264.s013) [file journal.pbio.0060264.s013]
